# Supplementary material
Source: MDPI journal article supplement (https://www.mdpi.com/2071-1050/15/15/11992)
Supplement: s1 [file s1]

## Supplementary Materials

**Table S1.** Operating parameter of the microwave digestion system for digesting soil samples for analyzing heavy metals

| Nr | Operating parameters of microwave digestion Mars 6 |            |
|----|----------------------------------------------------|------------|
| 1  | Power                                              | (~ 1200 W) |
| 2  | Rising temperature duration                        | 10 minutes |
| 3  | Holding time                                       | 15 minutes |
| 4  | Digestion temperature                              | 170 °C     |
| 5  | Cooling time                                       | 20 minutes |

**Table S2.** ICP-MS Agilent 7900 parameters and the recovery values of heavy metals

| Operating conditions of ICP-MS Agilent 7900      |                                                        |                 |               |
|--------------------------------------------------|--------------------------------------------------------|-----------------|---------------|
| High-Frequency Power (w)                         | ~1600                                                  |                 |               |
| Sampling depth (mm)                              | ~10                                                    |                 |               |
| Carrier gas flow rate (L/min)                    | ~0,7                                                   |                 |               |
| Auxiliary gas flow rate (L/min)                  | ~0,3                                                   |                 |               |
| Peristaltic nebulizer (concentric glass)         | MicroMist                                              |                 |               |
| Spray chamber temperature (°C)                   | 2                                                      |                 |               |
| Helium gas flow rate (mL/min)                    | ~4,3                                                   |                 |               |
| Hydrogen gas flow rate (mL/min)                  | ~4,2                                                   |                 |               |
| Peristaltic pump speed                           | 0,1 (0,5 mL/min)                                       |                 |               |
| Internal standard                                | <sup>115</sup> In                                      |                 |               |
| Isotopes                                         | <sup>208</sup> Pb, <sup>111</sup> Cd, <sup>66</sup> Zn |                 |               |
| LOD and LOQ values of metals using ICP-MS        | Element                                                | LOD<br>(ng/L)   | LOQ<br>(ng/L) |
|                                                  | Pb                                                     | 13.7            | 41.5          |
|                                                  | Zn                                                     | 1.5             | 4.5           |
| Recovery values of metal elements (%) for MESS-4 | Element                                                | Recovery<br>(%) | RSD<br>(%)    |
|                                                  | Pb                                                     | 109.27          | 9.82          |
|                                                  | Zn                                                     | 103.22          | 13.47         |

**Table S3.** Tessier's sequential extraction procedure

| Step | Fractions                   | Reagent extractions/ conditions                                            |
|------|-----------------------------|----------------------------------------------------------------------------|
| 1    | Exchangeable (F1)           | 10 mL NH <sub>4</sub> OAc 1M, 1 hour shaking                               |
| 2    | Carbonates bound (F2)       | 20 mL NH <sub>4</sub> OAc 1M/HOAc pH = 5,<br>5 hours shaking               |
| 3    | Fe and Mn oxides bound (F3) | 20 mL NH <sub>2</sub> OH.HCl 0,04M/HOAc 25%,<br>5 hours shaking            |
| 4    | Organic matter bound (F4)   | 10 mL NH <sub>4</sub> OAc 3,2M + HNO <sub>3</sub> 20%,<br>0.5 hour shaking |
| 5    | Residual (F5)               | 50 mL HNO <sub>3</sub> + HCl (v/v = 1:3),<br>0.5 hour shaking              |

**Table S4.** The percentages of Pb and Zn's chemical fractionations in the soils following one-month incubation with biochar (PSB300, CCB300) and the mixture of biochar/apatite.

| Metal     | Sample | F1 (%) | F2 (%) | F3 (%) | F4 (%) | F5 (%) |
|-----------|--------|--------|--------|--------|--------|--------|
| <b>Pb</b> | CS     | 19.4   | 46.2   | 11.6   | 4.3    | 18.4   |
|           | PSB3:3 | 14.2   | 47.3   | 13.4   | 4.9    | 20.2   |
|           | PSB3:5 | 14.7   | 47.7   | 11.6   | 5.3    | 20.7   |
|           | PSB3A3 | 16.4   | 44.9   | 12.2   | 4.4    | 22.1   |
|           | CCB3:3 | 16.8   | 46.3   | 13.1   | 4.7    | 19.1   |
|           | CCB3:5 | 15.6   | 48.7   | 10.8   | 4.8    | 20.1   |
|           | CCB3A3 | 17.3   | 48.9   | 10.7   | 4.6    | 18.5   |
| <b>Zn</b> | CS     | 14.9   | 25.7   | 31.4   | 1.3    | 26.7   |
|           | PSB3:3 | 10.5   | 28.1   | 31.6   | 1.5    | 28.4   |
|           | PSB3:5 | 11.1   | 29.2   | 27.6   | 1.9    | 30.1   |
|           | PSB3A3 | 11.3   | 28.9   | 29.5   | 1.4    | 28.9   |
|           | CCB3:3 | 13.0   | 26.7   | 28.3   | 1.5    | 30.4   |
|           | CCB3:5 | 11.2   | 28.5   | 26.2   | 1.8    | 32.2   |
|           | CCB3A3 | 12.0   | 29.3   | 26.4   | 1.8    | 30.4   |
